1 **Phenome-wide and Genome-wide Analyses of Quality of Life**  
2 **in Schizophrenia**

3  
4 Raha Pazoki, MD, PhD<sup>1,2\*</sup>, Bochao Danae Lin, PhD<sup>3\*</sup>, Kristel R. van Eijk<sup>3</sup>, PhD, Dick  
5 Schijven<sup>1,3</sup>, MsC, Sinan Guloksuz MD, PhD<sup>4,5</sup>, GROUP investigators#, Jurjen J.  
6 Luykx, MD, PhD<sup>1,3</sup>

7 1 Department of Psychiatry, Brain Center Rudolf Magnus, University Medical  
8 Center Utrecht, Utrecht University, Utrecht, the Netherlands

9 2 Department of Epidemiology, Imperial College London, School of Public Health,  
10 UK

11 3 Department of Translational Neuroscience, Brain Center Rudolf Magnus,  
12 University Medical Center Utrecht, Utrecht University, Utrecht, the Netherlands

13 4 Department of Psychiatry and Neuropsychology, Maastricht University Medical  
14 Center, School for Mental Health and Neuroscience, Maastricht, the Netherlands

15 5 Department of Psychiatry, Yale University School of Medicine, New Haven,  
16 Connecticut, USA

17 \*These authors contributed equally to this work

18  
19 Corresponding author:

20 Jurjen Luykx, Department of Psychiatry, Brain Center Rudolf Magnus, University  
21 Medical Center Utrecht, Utrecht University, Utrecht, the Netherlands

22 Email: J.Luykx@umcutrecht.nl

23 Running head: contributors to quality of life in schizophrenia

24 Word count: body 2,996; abstract 240.

25 Number of tables: 2; number of figures: 2.

26 Keywords: quality of life, schizophrenia, phenome, genome, polygenic.

27

28

29 **Genetic Risk and Outcome of Psychosis (GROUP) Investigators**

30 GROUP investigators are: Behrooz Z. Alizadeh<sup>a,p</sup>, Therese van Amelsvoort<sup>g</sup>, Agna  
31 A. Bartels-Velthuis<sup>a</sup>, Nico J. van Beveren<sup>b,c,d</sup>, Richard Bruggeman<sup>a,l</sup>, Wiepke  
32 Cahn<sup>e,k</sup>, Lieuwe de Haan<sup>f,o</sup>, Philippe Delespaul<sup>g</sup>, Jurjen J. Luykx<sup>e,m</sup>, Inez Myin-  
33 Germeys<sup>h</sup>, Rene S. Kahn<sup>e,n</sup>, Frederike Schirmbeck<sup>f,o</sup>, Claudia J.P. Simons<sup>g,i</sup>, Jim van  
34 Os<sup>e,j</sup>, Ruud van Winkel<sup>g,h</sup>

35

36 <sup>a</sup> University of Groningen, University Medical Center Groningen, University

37 Center for Psychiatry, Rob Giel Research center, The Netherlands;

38 <sup>b</sup> Antes Center for Mental Health Care, Rotterdam, The Netherlands;

39 <sup>c</sup> Erasmus MC, Department of Psychiatry, Rotterdam, The Netherlands;

40 <sup>d</sup> Erasmus MC, Department of Neuroscience, Rotterdam, The Netherlands;

41 <sup>e</sup> University Medical Center Utrecht, Department of Psychiatry, Brain Centre

42 Rudolf Magnus, Utrecht University, Utrecht, The Netherlands;

43 <sup>f</sup> Amsterdam UMC, University of Amsterdam, Department of Psychiatry,

44 Amsterdam, The Netherlands;

45 <sup>g</sup> Maastricht University Medical Center, Department of Psychiatry and

46 Neuropsychology, School for Mental Health and Neuroscience, Maastricht, The

47 Netherlands;

48 <sup>h</sup> KU Leuven, Department of Neuroscience, Research Group Psychiatry, Leuven,

49 Belgium;

50 <sup>i</sup> GGzE Institute for Mental Health Care, Eindhoven, the Netherlands;

51 <sup>j</sup> King's College London, King's Health Partners, Department of Psychosis Studies,

52 Institute of Psychiatry, London, United Kingdom

53 <sup>k</sup> Altrecht, General Mental Health Care, Utrecht, The Netherlands

54 <sup>l</sup> University of Groningen, Department of Clinical and Developmental

55 Neuropsychology, Groningen, The Netherlands

56 <sup>m</sup> University Medical Center Utrecht, Department of Translational Neuroscience,

57 Brain Center Rudolf Magnus, Utrecht, The Netherlands

58 <sup>n</sup> Department of Psychiatry, Icahn School of Medicine at Mount Sinai, New York,

59 NY

60 <sup>o</sup> Arkin, Institute for Mental Health, Amsterdam, The Netherlands

61 <sup>p</sup> University Medical Center Groningen, Department of Epidemiology, Groningen,

62 The Netherlands

## 63 **Abstract**

64 *Background* Schizophrenia negatively impacts quality of life (QoL). A handful of  
65 variables from small studies have been reported to influence QoL of  
66 schizophrenia patients, but a study comprehensively dissecting the genetic and  
67 non-genetic contributing factors to QoL in these patients is currently lacking. We  
68 adopted a hypothesis-generating approach to assess the phenotypic and  
69 genotypic determinants of QoL in schizophrenia.

70 *Method* The study population consisted of 1,119 patients with a psychotic  
71 disorder, 1,979 relatives and 586 healthy controls. Using linear regression, we  
72 tested >100 independent demographic, cognitive and clinical phenotypes for  
73 their association with QoL in patients. We then performed genome-wide  
74 association analyses of QoL and examined the association between polygenic  
75 risk scores (PRSs) for schizophrenia, major depressive disorder (MDD), and  
76 subjective wellbeing (SW) with QoL.

77 *Results* We found nine phenotypes to be significantly and independently  
78 associated with QoL in patients, the most significant ones being negative (Beta=-  
79 1.17; SE=0.05,  $P=1\times 10^{-83}$ ;  $r^2=53\%$ ), depressive (Beta=-1.07; SE=0.05;  $P=2\times 10^{-79}$ ;  
80  $r^2=51\%$ ) and emotional distress (Beta=-0.09; SE=0.01;  $P=4\times 10^{-59}$ ,  $r^2=38\%$ )  
81 symptoms. Schizophrenia and subjective wellbeing PRSs using various P-value  
82 thresholds were significantly and consistently associated with QoL (lowest  
83 association p-value =  $6.8\times 10^{-6}$ ). Several sensitivity analyses confirmed the  
84 results.

85 *Conclusions* Various clinical phenotypes of schizophrenia as well as  
86 schizophrenia and subjective wellbeing polygenic risk scores are associated with  
87 QoL in schizophrenia patients and their relatives. These may be targeted by

- 88 clinicians to more easily identify vulnerable schizophrenia patients for further
- 89 social and clinical interventions to improve their QoL.

## 90 **Introduction**

91 Schizophrenia (SCZ) patients often experience adverse outcomes such as  
92 unemployment, frequent hospital admissions, long-term dependency on health  
93 care, and suicide. Premature mortality of patients with SCZ has been reported to  
94 be 3.5 times (Olfson et al., 2015) greater than that of adults in the general  
95 population. The societal costs of SCZ during a 12-month period have been  
96 estimated to be as high as \$890 million in the United States (Evensen et al.,  
97 2015). All domains of quality of life (QoL; physical, psychological, and social) are  
98 severely decreased in SCZ compared to healthy controls. QoL is also increasingly  
99 becoming an important index for effectiveness of treatment in SCZ (Kane et al.,  
100 2016). Several variables have been shown to be associated with QoL among SCZ  
101 patients, e.g. age, gender, employment status, marital status, duration of illness,  
102 body mass index, antipsychotic medication, number of hospitalizations,  
103 knowledge level about schizophrenia, schizophrenia symptoms, coping  
104 mechanisms, and comorbid depression (Hasan and Tumah, 2019, Hofer et al.,  
105 2017, Hou et al., 2016, Karow et al., 2014, Rayan and Obiedate, 2017, Rotstein et  
106 al., 2018, Savill et al., 2016, Wang et al., 2017, Yamauchi et al., 2008). However, a  
107 comprehensive large-scale study using in-depth phenotyping to investigate  
108 factors associated with QoL in SCZ in a hypothesis-generating fashion is lacking.  
109 In addition, to the best of our knowledge, the genetic underpinnings of QoL have  
110 not been investigated. Recently published genome-wide association studies  
111 (GWASs) for SCZ (Ripke et al., 2014) and related traits such as major depressive  
112 disorder (MDD) (Wray et al., 2018) and subjective wellbeing (Okbay et al., 2016)  
113 provide a timely opportunity to investigate whether genetic mechanisms are at  
114 the root of QoL. Knowledge of clinical and genetic contributing factors to QoL in

115 SCZ could inform clinicians to help identify vulnerable patients and optimize  
116 secondary preventive care and thus reduce burden of disease. This could be  
117 achieved through optimization of treatment regimens (e.g. psychosocial  
118 interventions or optimizing psychopharmacological treatments) and targeting  
119 clinical variables negatively influencing QoL. On a similar note, insight into  
120 genetic factors contributing to QoL could contribute to the early identification of  
121 vulnerable patients and in the future improve their outcome.

122 Here, we used a hypothesis-generating approach and investigated over 100  
123 phenotypes to investigate factors related to QoL among SCZ patients. We  
124 additionally performed genetic risk scoring in patients, relatives and healthy  
125 controls to uncover associations between genetic susceptibility to SCZ, MDD and  
126 subjective wellbeing on the one hand and QoL on the other.

127

## 128 **Method**

### 129 *Subjects and study design*

130 All procedures contributing to this work comply with the ethical standards of the  
131 relevant national and institutional committees on human experimentation and  
132 with the Helsinki Declaration of 1975, as revised in 2008. All procedures  
133 involving human subjects/patients were approved by the medical-ethical  
134 committee of University Medical Center Utrecht (UMCU). All subjects provided  
135 written informed consent for the current study. The current study was  
136 performed within a cohort of 3,684 individuals including 1,119 SCZ patients,  
137 1,059 siblings, 920 parents, and 586 controls (**Supplementary Results, Suppl.**  
138 **Figure 1**). We used two main subsets. The first subset included patients only  
139 (n=1,119) to test non-genetic contributing factors to QoL among SCZ patients.  
140 We chose this subset as we were interested in phenotypic contributing factors to  
141 QoL in patients, while other, larger cohort studies may be more appropriate to  
142 probe contributing factors to QoL in the general population. The second subset  
143 included patients, relatives and controls with genetic data available (n=2,265) to  
144 test genetic contributing factors to QoL. We chose this subset to increase  
145 statistical power and as intuitively genetic contributing factors to QoL may  
146 (partly) overlap between patients, relatives and controls. All participants were  
147 included from the Genetic Risk and Outcome of Psychosis (GROUP) study  
148 (Korver et al., 2012), a multi-center and large longitudinal study in the  
149 Netherlands and Belgium, investigating various psychological and genetic  
150 variables among SCZ patients and their relatives. The study population was  
151 followed up since 2004 in several mental health care institutions, both in the



152 Netherlands and Belgium. The detailed phenotypic information of GROUP  
153 participants offers a unique and enriched database (Korver et al., 2012).  
154 Psychosis-related and demographic variables that were included in the analysis  
155 are presented in **Appendix 1 (Supplemental Methods)**. These variables may be  
156 divided into symptoms and experiences that were assessed with a range of  
157 (semi)-structured scales (including drug use); family loading for psychiatric  
158 disorders; social cognition; demographic variables; IQ; medication use data; and  
159 theory of mind scales. For the purpose of the current study, we only used the  
160 baseline assessments of the GROUP study (release 5.00) as we were interested in  
161 factors contributing to QoL in SCZ apparent in its early disease stages (the first  
162 psychotic episode of the GROUP participating patients had to occur within 10  
163 years before this first assessment). **Supplementary Figure 1** shows a  
164 breakdown of the study sample.

#### 165 *Quality of Life Assessment*

166 Quality of life was assessed with the World Health Organization WHOQOL-BREF,  
167 an abbreviated version of the WHOQOL (World Health Organization Quality of  
168 Life scale). The self-report WHOQOL-BREF has been validated for a Dutch  
169 speaking population of psychiatric patients (Korver et al., 2012, Trompenaars et  
170 al., 2005, Gobbens and van Assen, 2016). Details of the Dutch WHOQOL-BREF are  
171 described elsewhere (Gobbens and van Assen, 2016). Details of our method to  
172 extract a single principal component derived from this questionnaire that was  
173 used for further analysis are described in the supplemental methods.

174 *Phenome-wide analyses*

175 For the agnostic association analysis of QoL with the above explained  
176 demographic and clinical phenotypes (**Supplemental methods, Appendix 1**),  
177 we used data from patients with complete data on the QoL principal component,  
178 age, sex, and study site (N=925; **Supplementary Figure 1**). The number of  
179 independent variables was calculated by testing two-by-two correlations  
180 between variables using non-parametric Spearman correlation. Variables with  
181 correlation estimates > 0.3 and statistically significant correlations (P value<  
182 0.05) were considered interdependent variables. This analysis resulted in 105  
183 independent variables. Generalized linear models (GLM) adjusted for age, sex,  
184 and study site were then used to test the association of QoL with each of the  
185 clinical phenotypes. The statistical significance threshold for this association  
186 analysis was corrected for multiple testing using the Bonferroni-correction  
187 method, i.e.  $4.76 \times 10^{-04}$  (0.05 adjusted for 105 independent tests)(Shaffer, 1995).  
188 The variance in QoL explained by the phenotypes was calculated using R square  
189 values obtained from GLM. To then identify a set of variables that were  
190 associated with QoL independent of one another, we used the phenotypes that  
191 were associated with QoL at  $P < 4.76 \times 10^{-04}$  and selected the independent  
192 variables in a backward stepwise regression model. As a sensitivity analysis, we  
193 then regressed the most significantly associated phenotypes with ordinal  
194 estimates of QoL as opposed to the first principal component of QoL.

195 *Polygenic risk score analyses of QoL*

196 Details of genotyping and GWAS of QoL can be found in the Supplementary  
197 methods. In brief, genotype data for 2,812 GROUP participants was generated on

198 a customized Illumina IPMCN array with 570,038 single nucleotide  
199 polymorphisms (SNPs). Quality control procedures were performed using PLINK  
200 v1.9(Purcell et al., 2007). In total, 2,505 individuals and 275,021 SNPs passed  
201 these abovementioned QC steps. After merging with the phenotype file, 2,265  
202 individuals were left for genetic analyses (**Supplemental Results,**  
203 **Supplementary Figure 1**).

204 Additional SNPs were imputed on the Michigan server (Das et al., 2016) using  
205 the HRC r1.1 2016 reference panel. Although likely underpowered, for the  
206 benefit of possible future meta-analyses and as a first exploratory approach we  
207 performed linear mixed models (LMM) association testing implemented in  
208 BOLT-LMM (v2.3) software(Loh et al., 2015) to assess associations between  
209 SNPs and QoL (**Supplemental methods**). BOLT-LMM corrects for confounding  
210 from population structure and cryptic relatedness. We used the generally  
211 accepted association P-value threshold of  $P < 5 \times 10^{-8}$  for genome-wide  
212 significance. We report those findings in the **Supplemental Results (Figures**  
213 **7&8)**.

214 We used recent GWASs of SCZ (Ripke et al., 2014), MDD (Wray et al., 2018), and  
215 subjective wellbeing (Okbay et al., 2016) for PRS calculations (Choi et al., 2018).  
216 We chose the polygenic risk scores of these disorders as they are strongly  
217 associated with QoL in the general population (IsHak et al., 2015, Skevington and  
218 Böhnke, 2018, Camfield and Skevington, 2008, Domenech et al., 2018). To verify  
219 that PRS of other traits were indeed unlikely to be associated with QoL, the  
220 genetic correlations between the primary BOLT- LMM GWAS summary statistics  
221 and over 700 other disease traits were estimated using LD score regression

222 (<http://ldsc.broadinstitute.org/>) (Zheng et al., 2017). As a quality control for PRS  
223 calculation, the SNPs that overlapped between the summary statistics GWASs  
224 (training datasets) and our dataset were extracted. Then, insertions or deletions,  
225 ambiguous SNPs, SNPs with minor allele frequency (MAF) <0.01 and imputation  
226 quality ( $R^2$ ) < 0.8 in both training and target datasets were excluded. To account  
227 for complicated LD structure of SNPs in the genome, these SNPs were clumped in  
228 two rounds using PLINK 1.90b3z (Chang et al., 2015) according to previously  
229 established methods (McLaughlin et al., 2017b, Schur et al., 2019); round 1 with  
230 the default parameters (physical distance threshold 250kb and LD threshold ( $R^2$ )  
231 0.5); round 2 with a physical distance threshold of 5,000kb and LD threshold  
232 ( $R^2$ ) 0.2. Additionally, we excluded all SNPs in genomic regions with strong or  
233 complex LD structures (e.g. the MHC region on chromosome 6; **Supplemental**  
234 **Results, Supplementary Table 1**). If only odds ratios (ORs) were reported in  
235 the summary statistics, ORs were log-converted to beta values as effect sizes. To  
236 prevent possible study population overlap impacting our results, all Dutch and  
237 Belgian individuals had been excluded from the SCZ GWAS (Ripke et al., 2014) to  
238 allow unbiased PRS computation (McLaughlin et al., 2017a). Sample overlap  
239 between GROUP data with MDD and subjective wellbeing GWAS samples is  
240 unlikely since all samples belong to different cohorts. To reassure that there was  
241 indeed minimal to no sample overlap between GROUP vs. MDD and subjective  
242 well-being samples, we checked the intercepts of the genetic covariances from  
243 LD score regression analyses between the GROUP GWAS vs. MDD and subjective  
244 well-being. Presence of sample overlap modifies this intercepts from zero (Bulik-  
245 Sullivan et al., 2015), while in our study all intercepts turned out to be close to  
246 zero (**Supplemental Methods & Supplemental Results, Supplementary table**

247 **2).** We constructed PRSs based on SCZ risk alleles weighted by their SCZ  
248 increasing effect estimate using the Purcell et al. method (Purcell et al., 2007,  
249 Purcell et al., 2009), i.e. using PLINK's score function for 12 GWAS p-value  
250 thresholds:  $5 \times 10^{-8}$ ,  $5 \times 10^{-7}$ ,  $5 \times 10^{-6}$ ,  $5 \times 10^{-5}$ ,  $5 \times 10^{-4}$ ,  $5 \times 10^{-3}$ , 0.05, 0.1, 0.2, 0.3,  
251 0.4 and 0.5. PRSs were calculated for 2,505 patients, relatives and controls (those  
252 remaining after QC). Genetic data and QoL variables were available for patients,  
253 relatives, and controls. We thus performed statistical analyses for the association  
254 of PRSs with QoL in the whole sample after QC (N=2,265; **Supplemental**  
255 **Results, Supplementary Figure 1**) including patients, controls and family  
256 members. This approach provided the opportunity to investigate genetic  
257 susceptibility of these PRSs on QoL regardless of presence or absence of the  
258 disease. To claim significance for association analyses between PRS and QoL, we  
259 Bonferroni corrected the P-value for multiple testing ( $0.05/3=0.016$ ).

260

261 *Data availability*

262 All authors have continuous access to the data, both phenotypic and genotypic,  
263 collected in this study.

264

## 265 **Results**

266 **Table 1** shows baseline characteristics of patients, relatives and controls. In the  
267 generalized linear model (GLM), 18 distinct variables were associated with QoL  
268 at the Bonferroni significance threshold of  $4.76 \times 10^{-04}$  in schizophrenia patients  
269 (**Figure 1, Table 2 & Supplemental Results, Supplementary Figure 3**). The  
270 statistically most significant phenotypes were negative (Beta=-1.17; SE=0.05,  
271  $P=1 \times 10^{-83}$ ;  $r^2_{\text{model}}=53\%$ ), depressive (Beta=-1.07; SE=0.05;  $P=2 \times 10^{-79}$ ;  
272  $r^2_{\text{model}}=51\%$ ), emotional distress (Beta=-0.09; SE=0.01;  $P=4 \times 10^{-59}$ ,  $r^2_{\text{model}}=38\%$ ),  
273 and general psychopathology (Beta=0.81; SE=0.06;  $P=3 \times 10^{-40}$ ;  $r^2_{\text{model}}=29\%$ )  
274 symptoms (**Table 2**). In our regression model including these 18 variables, nine  
275 remained independently associated with QoL ( $p\text{-value}<0.05$ ), explaining 58.55%  
276 of the variance in QoL. Ordered by decreasing level of significance these are:  
277 negative symptoms, global assessment of functioning, emotional distress,  
278 depressive symptoms, positive symptoms, remission status, cannabis craving,  
279 number of unmet needs, and excitement (**Table 2 & Supplemental Results,**  
280 **Supplementary Table 3**). In addition, there was a negative age effect (Beta=-  
281 0.01; SE=0.003;  $P=3 \times 10^{-3}$ ) on QoL in the backward stepwise model  
282 (**Supplemental Results, Supplementary Table 3**). Association analysis  
283 between ordinal estimates of QoL showed similar results (**Supplemental**  
284 **Results, Supplementary Figure 4**).

285 The variance in QoL explained by various PRSs (N=2,265) were 1.37% for SCZ,  
286 1.37% for subjective wellbeing (**Figure 2**), and 1.40% for MDD (**Supplemental**  
287 **Results, Supplementary Figure 5**) when using only genome-wide significant  
288 SNPs (P-value threshold (Pt) of  $5 \times 10^{-8}$ ). The most significant associations

289 between PRS and QoL were observed for SCZ (Pt<sub>0.5</sub>; explained variance=1.58%, P  
290 = $7 \times 10^{-6}$ ; **Figure 1**), subjective wellbeing (Pt<sub>0.4</sub>; explained variance=1.82%,  
291 P=0.004; **Figure 1**), and MDD (Pt<sub>0.005</sub>; explained variance=1.62%, P= 0.01;  
292 **Supplemental Results, Supplementary Figure 5**). As a sensitivity analysis, we  
293 repeated the SCZ PRS analysis on patients only (N=633) and confirmed the same  
294 pattern of association with QoL and the same Pt of 0.5 showing most significant  
295 association results (**Supplemental Results, Supplementary Figure 6**). As  
296 expected given relatively low statistical power, genetic correlation analysis in LD  
297 Hub showed no statistically significant results. Confirming our rationale for  
298 investigating the PRSs chosen in the current study, genetic correlations of QoL  
299 with SCZ (Ripke et al., 2014) and subjective wellbeing (Okbay et al., 2016) were  
300 the strongest, in the expected direction (**Supplemental Results,**  
301 **Supplementary Table 2**).

302 SCZ Pt<sub>0.5</sub> (P = $7 \times 10^{-6}$ ), MDD Pt<sub>0.005</sub> (P= 0.01), and subjective wellbeing Pt<sub>0.4</sub>  
303 (P=0.004) remained associated with QoL independent of one another. After  
304 additional adjustment for positive, negative, and depressive symptoms, SCZ PRS  
305 (Pt<sub>0.5</sub>; P= 0.002) and wellbeing PRS (Pt<sub>0.4</sub>; P=0.04) remained associated with QoL.  
306 Moreover, only SCZ and subjective wellbeing PRSs were consistent with true  
307 polygenicity explaining a proportion of the variance in QoL, as may be  
308 appreciated by increasing degrees of explained variances and increasing  
309 significance levels with relaxing Pts (**Figure 2**).

310 As stated above, all final clinical phenotypes included in our regression model  
311 together explained 58.55% of the variability in QoL. By adding SCZ Pt<sub>0.5</sub>, MDD

312 Pt<sub>0.005</sub>, and subjective wellbeing Pt<sub>0.4</sub>, the model explained 59.00% of the  
313 variability.



## 314 **Discussion**

315 We here identified non-genetic factors contributing to QoL among patients  
316 suffering from SCZ. Our results show that up to 58% of variance in QoL may be  
317 explained using a range of demographic and clinical variables. We additionally  
318 demonstrate that genetic predisposition to SCZ and subjective wellbeing explain  
319 a (small) proportion of variability in QoL on top of clinical variables. The novelty  
320 of our method lies in the use of hypothesis-generating approaches to investigate  
321 a vast number of SCZ-associated genetic and non-genetic variables.

322 Most of the previous studies into QoL in SCZ had small to moderate sample  
323 sizes (Wang et al., 2017, Cruz et al., 2016, Savill et al., 2016) and have shown the  
324 association of particularly negative and positive symptoms with QoL in SCZ. A  
325 recent study in 157 SCZ patients showed the effects of excitement (Domenech et  
326 al., 2018), positive, negative, and depressive (Domenech et al., 2018) symptoms  
327 on QoL. The study by Domenech et al. used only clinical symptoms based on  
328 PANSS. We tested clinical symptoms assessed using multiple internationally  
329 well-established scales (e.g. CAPE, PANSS, CAN) and assessed a range of other  
330 phenotypic variables. Such rich phenotyping together with our large sample size  
331 allowed us to firmly establish additional variables associated with QoL in SCZ at  
332 increased statistical significance. Moreover, this approach allowed us to weigh  
333 the effect of all variables in one model. In line with our findings, a recent meta-  
334 analysis also found a substantial association between depressive symptoms and  
335 personal recovery, a concept related to quality of life (Van Eck et al., 2018).

336 Several of the variables we found to be associated with QoL in SCZ had to  
337 the best of our knowledge not been reported, such as disorganization, obsessive

338 compulsive symptoms, suicidal attempts, unmet needs, acathisia, and cannabis  
339 craving. Although the underlying mechanisms of this latter association are still  
340 unclear, one may speculate that cannabis craving constitutes a proxy for  
341 cannabis abstinence, which in turn may increase anxiety and thus reduce  
342 psychological wellbeing. Alternatively, relatively high levels of cannabis  
343 dependence may worsen symptoms and thus negatively impact QoL.

344 Genetic predisposition to SCZ captured by PRS showed clear and persistent  
345 effects on QoL across all Pts. We also observed moderate effects of polygenic  
346 susceptibility to subjective well-being on QoL and no independent effects of  
347 genetic predisposition to MDD on QoL in our cohort.

348 The current study benefits from a large sample size of a multicenter prospective  
349 cohort study in the Netherlands with comprehensive phenotypic assessments in  
350 individuals with SCZ. The large sample size increases precision and reliability of  
351 our findings. The combination of a large sample size and rich phenotyping  
352 created a unique opportunity for a phenome-wide study to identify contributing  
353 factors to QoL in SCZ. In addition, carefully selected participants from several  
354 geographical locations restricted the risk of selection bias. On the other hand,  
355 several limitations should be borne in mind when interpreting our results. First,  
356 interpretation of principal component-driven variables may not be intuitive.  
357 Here, we managed to show its feasibility and usefulness. We reduced the number  
358 of variables of the four different domains of QoL into one variable and were able  
359 to assess the impact of multiple clinical and genetic determinants on this  
360 variable. Our results showed consistency in terms of direction and magnitude of  
361 the effect estimate when compared with ordinal domains of QoL

362 **(Supplementary Figure 3)**. Second, we are aware of relatively low power for  
363 genetic studies on a complex trait such as QoL both in our GWAS and LD score  
364 regression analyses. Our GWAS must therefore be regarded as a first exploratory  
365 GWAS of QoL in SCZ subjects, their siblings and healthy controls. Similarly, for LD  
366 score regression (LDSC), we were underpowered to reveal clear genetic  
367 correlations. LDSC analysis was done to explore possible genetic correlations  
368 with traits different from the ones we investigated and to investigate whether  
369 the trait with most significant genetic correlation results was identical to the  
370 trait with most significant PRS results, which indeed turned out to be the case.  
371 Third, in the current study population about 97% of participants were  
372 Caucasians which hampers generalizability to other ethnicities. Finally, our  
373 association analyses preclude us from drawing definite conclusions about  
374 causality. Future, well powered, prospective studies are necessary to improve  
375 insight into possible causal mechanisms.

376 In conclusion, we highlight multiple clinical and genetic associations with QoL  
377 that could be leveraged in daily care of patients with SCZ to improve their QoL.  
378 The variables highlighted in the current study could aid health professionals who  
379 interact with psychotic patients to more readily recognize the need for additional  
380 interventions in patients showing a high burden of such phenotypes. For  
381 example, although high levels of positive and negative symptoms are intuitively  
382 associated with QoL, disorganization, cannabis craving and obsessive-  
383 compulsive symptoms are also important contributors according to our analyses.  
384 Genetic risk scoring may furthermore be used to optimize identification of those

385 SCZ patients susceptible to low quality of life, which in turn may advance timely  
386 management for these vulnerable patients.

### 387 **Funding**

388 The infrastructure for the GROUP study is funded through the Geestkracht  
389 programme of the Dutch Health Research Council (Zon-Mw, grant number 10-  
390 000-1001), and matching funds from participating pharmaceutical companies  
391 (Lundbeck, AstraZeneca, Eli Lilly, Janssen Cilag) and universities and mental  
392 health care organizations (Amsterdam: Academic Psychiatric Centre of the  
393 Academic Medical Center and the mental health institutions: GGZ Ingeest, Arkin,  
394 Dijk en Duin, GGZ Rivierduinen, Erasmus Medical Centre, GGZ Noord Holland  
395 Noord. Groningen: University Medical Center Groningen and the mental health  
396 institutions: Lentis, GGZ Friesland, GGZ Drenthe, Dimence, Mediant, GGNet  
397 Warnsveld, Yulius Dordrecht and Parnassia psycho-medical center The Hague.  
398 Maastricht: Maastricht University Medical Centre and the mental health  
399 institutions: GGZ Eindhoven en De Kempen, GGZ Breburg, GGZ Oost-Brabant,  
400 Vincent van Gogh voor Geestelijke Gezondheid, Mondriaan, Virenze riagg,  
401 Zuyderland GGZ, MET ggz, Universitair Centrum Sint-Jozef Kortenberg, CAPRI  
402 University of Antwerp, PC Ziekeren Sint-Truiden, PZ Sancta Maria Sint-Truiden,  
403 GGZ Overpelt, OPZ Rekem. Utrecht: University Medical Center Utrecht and the  
404 mental health institutions Altrecht, GGZ Centraal and Delta).

### 405 **Conflict of interest statement**

406 All authors declare no conflict of interest.  
407

## 408 **References**

- 409  
410 BULIK-SULLIVAN, B., FINUCANE, H. K., ANTTILA, V., GUSEV, A., DAY, F. R., LOH,  
411 P.-R., REPROGEN, C., PSYCHIATRIC GENOMICS, C., GENETIC CONSORTIUM  
412 FOR ANOREXIA NERVOSA OF THE WELLCOME TRUST CASE CONTROL,  
413 C., DUNCAN, L., PERRY, J. R. B., PATTERSON, N., ROBINSON, E. B., DALY, M.  
414 J., PRICE, A. L. & NEALE, B. M. 2015. An atlas of genetic correlations across  
415 human diseases and traits. *Nature genetics*, 47, 1236-1241.
- 416 CAMFIELD, L. & SKEVINGTON, S. M. 2008. On subjective well-being and quality of  
417 life. *J Health Psychol*, 13, 764-75.
- 418 CHANG, C. C., CHOW, C. C., TELLIER, L. C., VATTIKUTI, S., PURCELL, S. M. & LEE, J.  
419 J. 2015. Second-generation PLINK: rising to the challenge of larger and  
420 richer datasets. *Gigascience*, 4, 7.
- 421 CHOI, S. W., MAK, T. S. H. & O'REILLY, P. 2018. A guide to performing Polygenic  
422 Risk Score analyses. *bioRxiv*.
- 423 CRUZ, B. F., DE RESENDE, C. B., CARVALHAES, C. F., CARDOSO, C. S., TEIXEIRA, A.  
424 L., KEEFE, R. S., ROCHA, F. L. & SALGADO, J. V. 2016. Interview-based  
425 assessment of cognition is a strong predictor of quality of life in patients  
426 with schizophrenia and severe negative symptoms. *Revista Brasileira De*  
427 *Psiquiatria*, 38, 216-221.
- 428 DAS, S., FORER, L., SCHONHERR, S., SIDORE, C., LOCKE, A. E., KWONG, A., VRIEZE,  
429 S. I., CHEW, E. Y., LEVY, S., MCGUE, M., SCHLESSINGER, D., STAMBOLIAN,  
430 D., LOH, P. R., IACONO, W. G., SWAROOP, A., SCOTT, L. J., CUCCA, F.,  
431 KRONENBERG, F., BOEHNKE, M., ABECASIS, G. R. & FUCHSBERGER, C.  
432 2016. Next-generation genotype imputation service and methods. *Nat*  
433 *Genet*, 48, 1284-1287.
- 434 DOMENECH, C., ALTAMURA, C., BERNASCONI, C., CORRAL, R., ELKIS, H., EVANS,  
435 J., MALLA, A., KREBS, M. O., NORDSTROEM, A. L., ZINK, M. & HARO, J. M.  
436 2018. Health-related quality of life in outpatients with schizophrenia:  
437 factors that determine changes over time. *Soc Psychiatry Psychiatr*  
438 *Epidemiol*, 53, 239-248.
- 439 EVENSEN, S., WISLOFF, T., LYSTAD, J. U., BULL, H., UELAND, T. & FALKUM, E.  
440 2015. Prevalence, Employment Rate, and Cost of Schizophrenia in a High-  
441 Income Welfare Society: A Population-Based Study Using Comprehensive  
442 Health and Welfare Registers. *Schizophr Bull*.
- 443 GOBBENS, R. J. J. & VAN ASSEN, M. A. L. M. 2016. Psychometric properties of the  
444 Dutch WHOQOL-OLD. *Health and Quality of Life Outcomes*, 14, 103.
- 445 HASAN, A. & TUMAH, H. 2019. Determinants of quality of life among people  
446 diagnosed with schizophrenia at outpatient clinics. *Perspectives in*  
447 *Psychiatric Care*, 55, 30-39.
- 448 HOFER, A., MIZUNO, Y., WARTELSTEINER, F., FLEISCHHACKER, W. W., FRAJO-  
449 APOR, B., KEMMLER, G., MIMURA, M., PARDELLER, S., SONDERMANN, C.,  
450 SUZUKI, T., WELTE, A. & UCHIDA, H. 2017. Quality of life in schizophrenia  
451 and bipolar disorder: The impact of symptomatic remission and  
452 resilience. *European Psychiatry*, 46, 42-47.
- 453 HOU, C. L., MA, X. R., CAI, M. Y., LI, Y., ZANG, Y., JIA, F. J., LIN, Y. Q., CHIU, H. F. K.,  
454 UNGVARI, G. S., HALL, B. J., ZHONG, B. L., CAO, X. L. & XIANG, Y. T. 2016.  
455 Comorbid Moderate-Severe Depressive Symptoms and their Association

- 456 with Quality of Life in Chinese Patients with Schizophrenia Treated in  
457 Primary Care. *Community Mental Health Journal*, 52, 921-926.
- 458 ISHAK, W. W., MIROCHA, J., JAMES, D., TOBIA, G., VILHAUER, J., FAKHRY, H., PI, S.,  
459 HANSON, E., NASHAWATI, R., PESELOW, E. D. & COHEN, R. M. 2015.  
460 Quality of life in major depressive disorder before/after multiple steps of  
461 treatment and one-year follow-up. *Acta psychiatrica Scandinavica*, 131,  
462 51-60.
- 463 KANE, J. M., ROBINSON, D. G., SCHOOLER, N. R., MUESER, K. T., PENN, D. L.,  
464 ROSENHECK, R. A., ADDINGTON, J., BRUNETTE, M. F., CORRELL, C. U.,  
465 ESTROFF, S. E., MARCY, P., ROBINSON, J., MEYER-KALOS, P. S., GOTTLIEB,  
466 J. D., GLYNN, S. M., LYNDE, D. W., PIPES, R., KURIAN, B. T., MILLER, A. L.,  
467 AZRIN, S. T., GOLDSTEIN, A. B., SEVERE, J. B., LIN, H. Q., SINT, K. J., JOHN,  
468 M. & HEINSEN, R. K. 2016. Comprehensive Versus Usual Community  
469 Care for First-Episode Psychosis: 2-Year Outcomes From the NIMH RAISE  
470 Early Treatment Program. *American Journal of Psychiatry*, 173, 362-372.
- 471 KAROW, A., WITTMANN, L., SCHOTTLE, D., SCHAFFER, I. & LAMBERT, M. 2014.  
472 The assessment of quality of life in clinical practice in patients with  
473 schizophrenia. *Dialogues in Clinical Neuroscience*, 16, 185-195.
- 474 KORVER, N., QUEE, P. J., BOOS, H. B., SIMONS, C. J. & DE HAAN, L. 2012. Genetic  
475 Risk and Outcome of Psychosis (GROUP), a multi-site longitudinal cohort  
476 study focused on gene-environment interaction: objectives, sample  
477 characteristics, recruitment and assessment methods. *Int J Methods*  
478 *Psychiatr Res*, 21, 205-21.
- 479 LOH, P.-R., TUCKER, G., BULIK-SULLIVAN, B. K., VILHJÁLMSSON, B. J., FINUCANE,  
480 H. K., SALEM, R. M., CHASMAN, D. I., RIDKER, P. M., NEALE, B. M., BERGER,  
481 B., PATTERSON, N. & PRICE, A. L. 2015. Efficient Bayesian mixed model  
482 analysis increases association power in large cohorts. *Nature genetics*, 47,  
483 284-290.
- 484 MCLAUGHLIN, R. L., SCHIJVEN, D., VAN RHEENEN, W., VAN EIJK, K. R., O'BRIEN,  
485 M., KAHN, R. S., OPHOFF, R. A., GORIS, A., BRADLEY, D. G., AL-CHALABI, A.,  
486 VAN DEN BERG, L. H., LUYKX, J. J., HARDIMAN, O. & VELDINK, J. H. 2017a.  
487 Genetic correlation between amyotrophic lateral sclerosis and  
488 schizophrenia. *Nat Commun*, 8, 14774.
- 489 MCLAUGHLIN, R. L., SCHIJVEN, D., VAN RHEENEN, W., VAN EIJK, K. R., O'BRIEN,  
490 M., KAHN, R. S., OPHOFF, R. A., GORIS, A., BRADLEY, D. G., AL-CHALABI, A.,  
491 VAN DEN BERG, L. H., LUYKX, J. J., HARDIMAN, O., VELDINK, J. H.,  
492 CONSORTIUM, P. M. G. & PSYCHIAT, S. W. G. 2017b. Genetic correlation  
493 between amyotrophic lateral sclerosis and schizophrenia. *Nature*  
494 *Communications*, 8.
- 495 OKBAY, A., BASELMANS, B. M. L., DE NEVE, J.-E., TURLEY, P., NIVARD, M. G.,  
496 FONTANA, M. A., MEDDENS, S. F. W., LINNÉR, R. K., RIETVELD, C. A.,  
497 DERRINGER, J., GRATTE, J., LEE, J. J., LIU, J. Z., DE VLAMING, R.,  
498 AHLUWALIA, T. S., BUCHWALD, J., CAVADINO, A., FRAZIER-WOOD, A. C.,  
499 FURLOTTE, N. A., GARFIELD, V., GEISEL, M. H., GONZALEZ, J. R.,  
500 HAITJEMA, S., KARLSSON, R., VAN DER LAAN, S. W., LADWIG, K.-H.,  
501 LAHTI, J., VAN DER LEE, S. J., LIND, P. A., LIU, T., MATTESON, L.,  
502 MIHAILOV, E., MILLER, M. B., MINICA, C. C., NOLTE, I. M., MOOK-  
503 KANAMORI, D., VAN DER MOST, P. J., OLDMEADOW, C., QIAN, Y.,  
504 RAITAKARI, O., RAWAL, R., REALO, A., RUEEDI, R., SCHMIDT, B., SMITH, A.

505 V., STERGIAKOULI, E., TANAKA, T., TAYLOR, K., THORLEIFSSON, G.,  
506 WEDENOJA, J., WELLMANN, J., WESTRA, H.-J., WILLEMS, S. M., ZHAO, W.,  
507 LIFELINES COHORT, S., AMIN, N., BAKSHI, A., BERGMANN, S.,  
508 BJORNSDOTTIR, G., BOYLE, P. A., CHERNEY, S., COX, S. R., DAVIES, G.,  
509 DAVIS, O. S. P., DING, J., DIREK, N., EIBICH, P., EMENY, R. T., FATEMIFAR,  
510 G., FAUL, J. D., FERRUCCI, L., FORSTNER, A. J., GIEGER, C., GUPTA, R.,  
511 HARRIS, T. B., HARRIS, J. M., HOLLIDAY, E. G., HOTTENGA, J.-J., DE JAGER,  
512 P. L., KAAKINEN, M. A., KAJANTIE, E., KARHUNEN, V., KOLCIC, I., KUMARI,  
513 M., LAUNER, L. J., FRANKE, L., LI-GAO, R., LIEWALD, D. C., KOINI, M.,  
514 LOUKOLA, A., MARQUES-VIDAL, P., MONTGOMERY, G. W., MOSING, M. A.,  
515 PATERNOSTER, L., PATTIE, A., PETROVIC, K. E., PULKKI-RÅBACK, L.,  
516 QUAYE, L., RÄIKKÖNEN, K., RUDAN, I., et al. 2016. Genetic variants  
517 associated with subjective well-being, depressive symptoms, and  
518 neuroticism identified through genome-wide analyses. *Nature Genetics*,  
519 48, 624.

520 OLFSON, M., GERHARD, T., HUANG, C., CRYSTAL, S. & STROUP, T. S. 2015.  
521 Premature Mortality Among Adults With Schizophrenia in the United  
522 States. *JAMA Psychiatry*, 72, 1172-81.

523 PURCELL, S., NEALE, B., TODD-BROWN, K., THOMAS, L., FERREIRA, M. A.,  
524 BENDER, D., MALLER, J., SKLAR, P., DE BAKKER, P. I., DALY, M. J. & SHAM,  
525 P. C. 2007. PLINK: a tool set for whole-genome association and  
526 population-based linkage analyses. *Am J Hum Genet*, 81, 559-75.

527 PURCELL, S. M., WRAY, N. R., STONE, J. L., VISSCHER, P. M., O'DONOVAN, M. C.,  
528 SULLIVAN, P. F. & SKLAR, P. 2009. Common polygenic variation  
529 contributes to risk of schizophrenia and bipolar disorder. *Nature*, 460,  
530 748-52.

531 RAYAN, A. & OBIEDATE, K. 2017. The Correlates of Quality of Life Among  
532 Jordanian Patients With Schizophrenia. *Journal of the American*  
533 *Psychiatric Nurses Association*, 23, 404-413.

534 RIPKE, S., NEALE, B. M., CORVIN, A., WALTERS, J. T. R., FARH, K. H., HOLMANS, P.  
535 A., LEE, P., BULIK-SULLIVAN, B., COLLIER, D. A., HUANG, H. L., PERS, T. H.,  
536 AGARTZ, I., AGERBO, E., ALBUS, M., ALEXANDER, M., AMIN, F., BACANU, S.  
537 A., BEGEMANN, M., BELLIVEAU, R. A., BENE, J., BERGEN, S. E.,  
538 BEVILACQUA, E., BIGDELI, T. B., BLACK, D. W., BRUGGEMAN, R.,  
539 BUCCOLA, N. G., BUCKNER, R. L., BYERLEY, W., CAHN, W., CAI, G. Q.,  
540 CAMPION, D., CANTOR, R. M., CARR, V. J., CARRERA, N., CATTS, S. V.,  
541 CHAMBERT, K. D., CHAN, R. C. K., CHEN, R. Y. L., CHEN, E. Y. H., CHENG, W.,  
542 CHEUNG, E. F. C., CHONG, S. A., CLONINGER, C. R., COHEN, D., COHEN, N.,  
543 CORMICAN, P., CRADDOCK, N., CROWLEY, J. J., CURTIS, D., DAVIDSON, M.,  
544 DAVIS, K. L., DEGENHARDT, F., DEL FAVERO, J., DEMONTIS, D., DIKEOS, D.,  
545 DINAN, T., DJUROVIC, S., DONOHUE, G., DRAPEAU, E., DUAN, J.,  
546 DUDBRIDGE, F., DURMISHI, N., EICHHAMMER, P., ERIKSSON, J., ESCOTT-  
547 PRICE, V., ESSIUX, L., FANOUS, A. H., FARRELL, M. S., FRANK, J., FRANKE,  
548 L., FREEDMAN, R., FREIMER, N. B., FRIEDL, M., FRIEDMAN, J. I., FROMER,  
549 M., GENOVESE, G., GEORGIEVA, L., GIEGLING, I., GIUSTI-RODRIGUEZ, P.,  
550 GODARD, S., GOLDSTEIN, J. I., GOLIMBET, V., GOPAL, S., GRATTEN, J., DE  
551 HAAN, L., HAMMER, C., HAMSHERE, M. L., HANSEN, M., HANSEN, T.,  
552 HAROUTUNIAN, V., HARTMANN, A. M., HENSKENS, F. A., HERMS, S.,  
553 HIRSCHHORN, J. N., HOFFMANN, P., HOFMAN, A., HOLLEGAARD, M. V.,

- 554 HOUGAARD, D. M., IKEDA, M., JOA, I., et al. 2014. Biological insights from  
555 108 schizophrenia-associated genetic loci. *Nature*, 511, 421-+.
- 556 ROTSTEIN, A., ROE, D., GELKOPF, M. & LEVINE, S. Z. 2018. Age of onset and  
557 quality of life among males and females with schizophrenia: A national  
558 study. *European Psychiatry*, 53, 100-106.
- 559 SAVILL, M., ORFANOS, S., REININGHAUS, U., WYKES, T., BENTALL, R. & PRIEBE, S.  
560 2016. The relationship between experiential deficits of negative  
561 symptoms and subjective quality of life in schizophrenia. *Schizophrenia*  
562 *Research*, 176, 387-391.
- 563 SCHUR, R. R., SCHIJVEN, D., BOKS, M. P., RUTTEN, B. P. F., STEIN, M. B., VELDINK,  
564 J. H., JOELS, M., GEUZE, E., VERMETTEN, E., LUYKX, J. J. & VINKERS, C. H.  
565 2019. The effect of genetic vulnerability and military deployment on the  
566 development of post-traumatic stress disorder and depressive symptoms.  
567 *Eur Neuropsychopharmacol*, 29, 405-415.
- 568 SHAFFER, J. P. 1995. Multiple Hypothesis Testing. *Annual Review of Psychology*,  
569 46, 561-584.
- 570 SKEVINGTON, S. M. & BÖHNKE, J. R. 2018. How is subjective well-being related to  
571 quality of life? Do we need two concepts and both measures? *Social*  
572 *Science & Medicine*, 206, 22-30.
- 573 TROMPENAARS, F. J., MASTHOFF, E. D., VAN HECK, G. L., HODIAMONT, P. P. & DE  
574 VRIES, J. 2005. Content validity, construct validity, and reliability of the  
575 WHOQOL-Bref in a population of Dutch adult psychiatric outpatients. *Qual*  
576 *Life Res*, 14, 151-60.
- 577 VAN ECK, R. M., BURGER, T. J., VELLINGA, A., SCHIRMBECK, F. & DE HAAN, L.  
578 2018. The Relationship Between Clinical and Personal Recovery in  
579 Patients With Schizophrenia Spectrum Disorders: A Systematic Review  
580 and Meta-analysis. *Schizophr Bull*, 44, 631-642.
- 581 WANG, X. Q., PETRINI, M. A. & MORISKY, D. E. 2017. Predictors of quality of life  
582 among Chinese people with schizophrenia. *Nursing & Health Sciences*, 19,  
583 142-148.
- 584 WRAY, N. R., RIPKE, S., MATTHEISEN, M., TRZASKOWSKI, M., BYRNE, E. M.,  
585 ABDELLAOUI, A., ADAMS, M. J., AGERBO, E., AIR, T. M., ANDLAUER, T. M.  
586 F., BACANU, S. A., BAEKVAD-HANSEN, M., BEEKMAN, A. F. T., BIGDELI, T.  
587 B., BINDER, E. B., BLACKWOOD, D. R. H., BRYOIS, J., BUTTENSCHON, H. N.,  
588 BYBJERG-GRAUHOLM, J., CAI, N., CASTELAO, E., CHRISTENSEN, J. H.,  
589 CLARKE, T. K., COLEMAN, J. I. R., COLODRO-CONDE, L., COUVY-  
590 DUCHESNE, B., CRADDOCK, N., CRAWFORD, G. E., CROWLEY, C. A.,  
591 DASHTI, H. S., DAVIES, G., DEARY, I. J., DEGENHARDT, F., DERKS, E. M.,  
592 DIREK, N., DOLAN, C. V., DUNN, E. C., ELEY, T. C., ERIKSSON, N., ESCOTT-  
593 PRICE, V., KIADEH, F. H. F., FINUCANE, H. K., FORSTNER, A. J., FRANK, J.,  
594 GASPAR, H. A., GILL, M., GIUSTI-RODRIGUEZ, P., GOES, F. S., GORDON, S. D.,  
595 GROVE, J., HALL, L. S., HANNON, E., HANSEN, C. S., HANSEN, T. F., HERMS,  
596 S., HICKIE, I. B., HOFFMANN, P., HOMUTH, G., HORN, C., HOTTENGA, J. J.,  
597 HOUGAARD, D. M., HU, M., HYDE, C. L., ISING, M., JANSEN, R., JIN, F. L.,  
598 JORGENSON, E., KNOWLES, J. A., KOHANE, I. S., KRAFT, J., KRETZSCHMAR,  
599 W. W., KROGH, J., KUTALIK, Z., LANE, J. M., LI, Y. H., LI, Y., LIND, P. A., LIU,  
600 X. X., LU, L. N., MACINTYRE, D. J., MACKINNON, D. F., MAIER, R. M., MAIER,  
601 W., MARCHINI, J., MBAREK, H., MCGRATH, P., MCGUFFIN, P., MEDLAND, S.  
602 E., MEHTA, D., MIDDELDORP, C. M., MIHAILOV, E., MILANESCHI, Y.,



603 MILANI, L., MILL, J., MONDIMORE, F. M., MONTGOMERY, G. W.,  
604 MOSTAFAVI, S., MULLINS, N., NAUCK, M., NG, B., et al. 2018. Genome-wide  
605 association analyses identify 44 risk variants and refine the genetic  
606 architecture of major depression. *Nature Genetics*, 50, 668-+.

607 YAMAUCHI, K., AKI, H., TOMOTAKE, M., IGA, J. I., NUMATA, S., MOTOKI, I., IZAKI,  
608 Y., TAYOSHI, S., KINOUCI, S., SUMITANI, S., TAYOSHI, S., TAKIKAWA, Y.,  
609 KANEDA, Y., TANIGUCHI, T., ISHIMOTO, Y., UENO, S. I. & OHMORI, T. 2008.  
610 Predictors of subjective and objective quality of life in outpatients with  
611 schizophrenia. *Psychiatry and Clinical Neurosciences*, 62, 404-411.

612 ZHENG, J., ERZURUMLUOGLU, A. M., ELSWORTH, B. L., KEMP, J. P., HOWE, L.,  
613 HAYCOCK, P. C., HEMANI, G., TANSEY, K., LAURIN, C., ST POURCAIN, B.,  
614 WARRINGTON, N. M., FINUCANE, H. K., PRICE, A. L., BULIK-SULLIVAN, B.  
615 K., ANTTILA, V., PATERNOSTER, L., GAUNT, T. R., EVANS, D. M., NEALE, B.  
616 M. & LIFECOURSE, E. G. 2017. LD Hub: a centralized database and web  
617 interface to perform LD score regression that maximizes the potential of  
618 summary level GWAS data for SNP heritability and genetic correlation  
619 analysis. *Bioinformatics*, 33, 272-279.

620

621 **Figure Legends**

622 **Figure 1. Results of the hypothesis-generating association analysis between**  
623 **clinical variables and QoL among SCZ patients with explained variance for**  
624 **QoL.** Number unmet needs, measured using the CAN, The Camberwell  
625 Assessment of Need. Subject in remission: measured using the PANSS subject in  
626 remission tool. PAS: Personality Assessment Screener. Suicide attempt: assessed  
627 using the composite file (a questionnaire with closed questions designed for the  
628 GROUP study). Cannabis thoughts: thoughts about cannabis use, measured using  
629 the OC-DUS (obsessive compulsive drug use scale). Deficit syndrome: measured  
630 using the SDS (Schedule for the Deficit Syndrome). OC total score: obsessive  
631 compulsive symptoms score measured with the Yale-Brown obsessive  
632 compulsive scale. Akathisia, measured using the Barnes akathisia rating scale.  
633 **Figure 2. Bar plot illustrating explained variance for association of**  
634 **polygenic risk scores of SCZ (schizophrenia) and subjective wellbeing with**  
635 **QoL (quality of life).** The figure illustrates the results using linear mixed  
636 models. Displayed are the number of SNPs (N), the strengths of the association  
637 results ( $-\log_{10} P$ ) and explained variances per Pt (p-value threshold).

**Table 1- Baseline characteristics for patients, siblings and controls.**

| <b>Characteristics</b>                              | <b>Patients<br/>(n=1,119)</b> | <b>Controls<br/>(n=586)</b> | <b>Siblings<br/>(n=1,059)</b> | <b>Parents<br/>(n=920)</b> |
|-----------------------------------------------------|-------------------------------|-----------------------------|-------------------------------|----------------------------|
| -Age in years, mean (sd)                            | 27.6(7.9)                     | 30.4(10.6)                  | 27.8(8.3)                     | 54.7(6.7)                  |
| -Gender, n (%) women                                | 267(23.9)                     | 317(54.1)                   | 577(54.5)                     | 528(57.4)                  |
| -IQ, estimated, mean (sd)                           | 95(16.1)                      | 109.7(15.1)                 | 102.8(15.6)                   | 103(17.0)                  |
| -Married/living together, n (%)                     | 97(9.3)                       | 234(41.1)                   | 411(40.2)                     | 153(70.8)                  |
| -Years of education , mean (sd)                     | 4 (2.1)                       | 5.4(1.8)                    | 5.1(2.1)                      | 5.1(2.3)                   |
| -Nicotine use, mean number of cigarettes daily (sd) | 11.7(11)                      | 3(6.5)                      | 4.9(8.4)                      | 4.3(8.8)                   |
| -Alcohol use, mean number of drinks per week (sd)   | 6.6(12.1)                     | 6.1(8.5)                    | 6.4(8.6)                      | 8.1(10.6)                  |
| -Current use of Antipsychotics, %                   | 1062(95)                      | 0 (0)                       | 0 (0)                         | 2(0.22)                    |
| -Duration of Illness (years), mean (sd)             | 4.2(4)                        | N/A                         | N/A                           | N/A                        |

**Table 2- The 18 distinct clinical variables associated with QoL in the generalized linear model (N= 925 schizophrenia patients).**

| <b>Variable</b>                                                     | <b>Scale</b>        | <b>Standardized<br/>Effect<br/>Estimate</b> | <b>Standard<br/>Error</b> | <b>Explained<br/>Variance</b> | <b>P<br/>Value</b>        |
|---------------------------------------------------------------------|---------------------|---------------------------------------------|---------------------------|-------------------------------|---------------------------|
| <b>Negative symptoms, points</b>                                    | <b>CAPE</b>         | <b>-1.17</b>                                | <b>0.05</b>               | <b>0.53</b>                   | <b>1×10<sup>-83</sup></b> |
| <b>Depressive symptoms, points</b>                                  | <b>CAPE</b>         | <b>-1.07</b>                                | <b>0.05</b>               | <b>0.51</b>                   | <b>2×10<sup>-79</sup></b> |
| <b>Emotional distress, points</b>                                   | <b>PANSS</b>        | <b>-0.09</b>                                | <b>0.01</b>               | <b>0.38</b>                   | <b>4×10<sup>-59</sup></b> |
| <b>General psychopathology<br/>symptoms, points</b>                 | PANSS               | -0.81                                       | 0.06                      | 0.29                          | 3×10 <sup>-40</sup>       |
| <b>Global assessment of functioning<br/>(disabilities), points*</b> | <b>GAF</b>          | <b>0.03</b>                                 | <b>0</b>                  | <b>0.26</b>                   | <b>2×10<sup>-34</sup></b> |
| <b>Positive symptoms, points</b>                                    | <b>CAPE</b>         | <b>-0.05</b>                                | <b>0</b>                  | <b>0.2</b>                    | <b>1×10<sup>-23</sup></b> |
| <b>Number of unmet needs, points</b>                                | <b>CAN</b>          | <b>-0.11</b>                                | <b>0.01</b>               | <b>0.19</b>                   | <b>3×10<sup>-23</sup></b> |
| <b>Remission status, yes</b>                                        | <b>PANSS</b>        | <b>-0.56</b>                                | <b>0.07</b>               | <b>0.15</b>                   | <b>8×10<sup>-17</sup></b> |
| <b>Excitement, points</b>                                           | <b>PANSS</b>        | <b>-0.06</b>                                | <b>0.01</b>               | <b>0.13</b>                   | <b>9×10<sup>-13</sup></b> |
| PAS total score                                                     | PANSS               | -0.25                                       | 0.04                      | 0.10                          | 5×10 <sup>-11</sup>       |
| Proportion unmet needs                                              | CAN                 | -0.69                                       | 0.11                      | 0.10                          | 2×10 <sup>-9</sup>        |
| Disorganization, points                                             | PANSS               | -0.03                                       | 0.01                      | 0.11                          | 3×10 <sup>-9</sup>        |
| Obsessive compulsive symptoms,<br>yes                               | Y-BOCS              | -0.43                                       | 0.08                      | 0.09                          | 4×10 <sup>-8</sup>        |
| Suicidal attempts (lifetime), yes                                   | Composite<br>file** | -0.43                                       | 0.08                      | 0.09                          | 6×10 <sup>-8</sup>        |
| <b>Cannabis craving, yes</b>                                        | <b>OC-DUS</b>       | <b>-0.31</b>                                | <b>0.06</b>               | <b>0.14</b>                   | <b>1×10<sup>-07</sup></b> |
| OCT Total score                                                     | OC-DUS              | -0.28                                       | 0.06                      | 0.13                          | 1×10 <sup>-06</sup>       |
| Deficit syndrome                                                    | SDS                 | -0.17                                       | 0.04                      | 0.06                          | 7×10 <sup>-05</sup>       |
| Acatheisia                                                          | BARS                | -0.13                                       | 0.04                      | 0.06                          | 3×10 <sup>-04</sup>       |

CAPE: Community Assessment of Psychic Experiences; PANSS: positive and negative syndrome scale; GAF, Global assessment of functioning; CAN, The Camberwell Assessment of Need; Y-BOCS: Yale-Brown obsessive compulsive scale; OC-DUS: obsessive-compulsive drug use scale; SDS: Schedule for the Deficit Syndrome; BARS: Barnes Akathisia Rating Scale Global, a clinical assessment scale for acathisia \* Greater score indicates better functioning. \*\* This scale contains a range of questions probing health. Note: **the clinical variables in bold were independently associated with QoL in our stepwise regression model.**

**Figure 1**

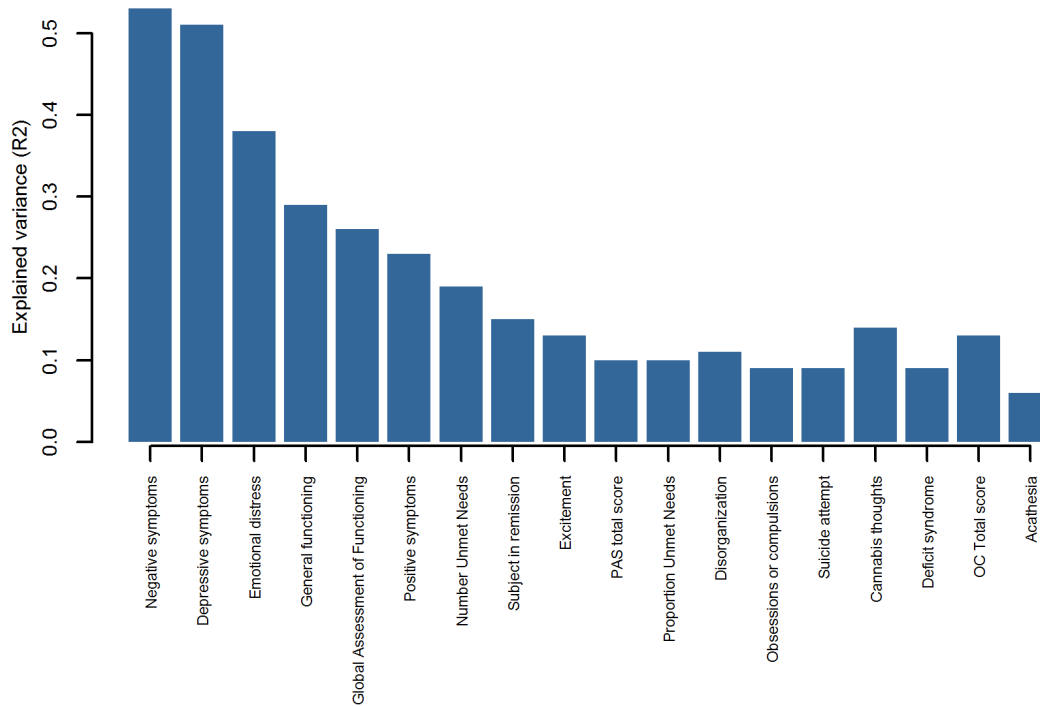

Figure 2

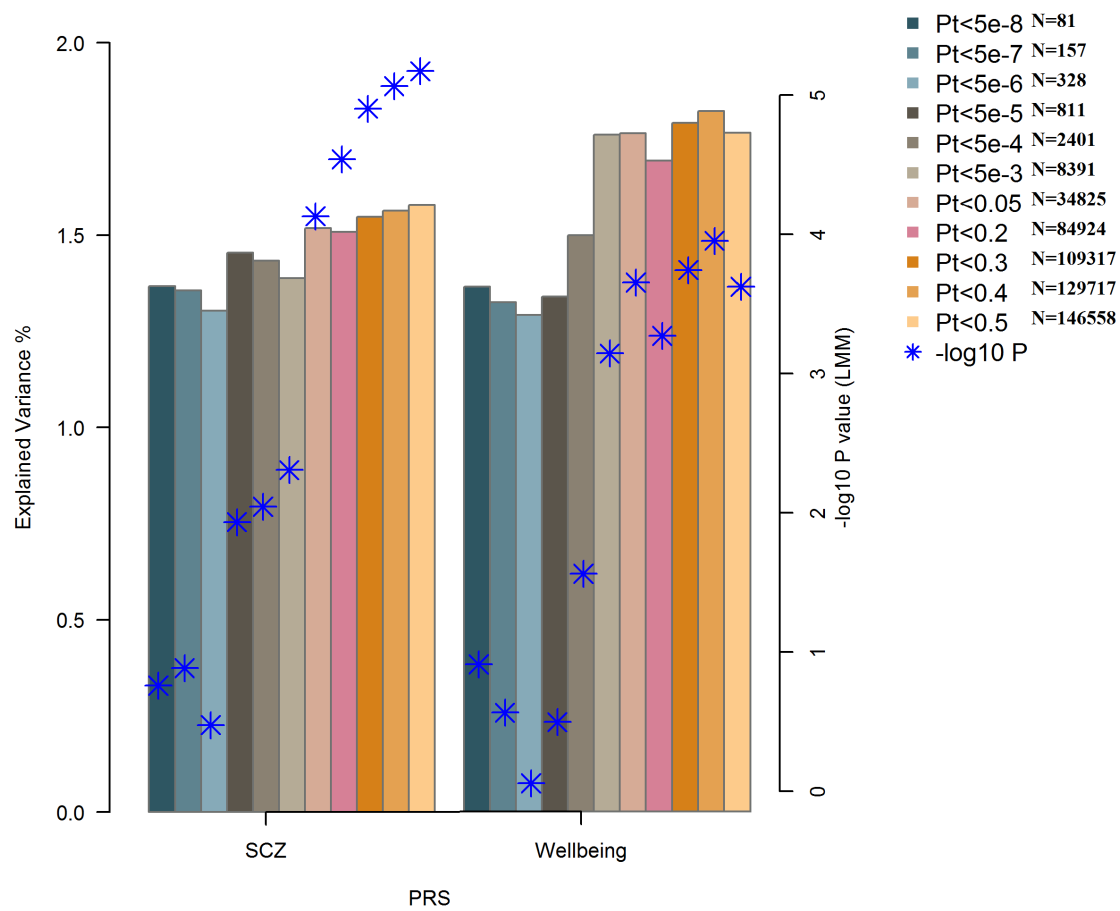

Source: https://www.biorxiv.org/content/biorxiv/early/2019/08/22/744045.full.pdf
